# Supplementary material for: Expression analysis data of BCL11A and γ-globin genes in KU812 and KG-1 cell lines after CRISPR/Cas9-mediated BCL11A enhancer deletion
Source: PubMed Central journal article supplement — Data Brief. 2019 Dec 11;28:104974. doi: 10.1016/j.dib.2019.104974 (PMC6933148; doi:10.1016/j.dib.2019.104974), 2019-12-11

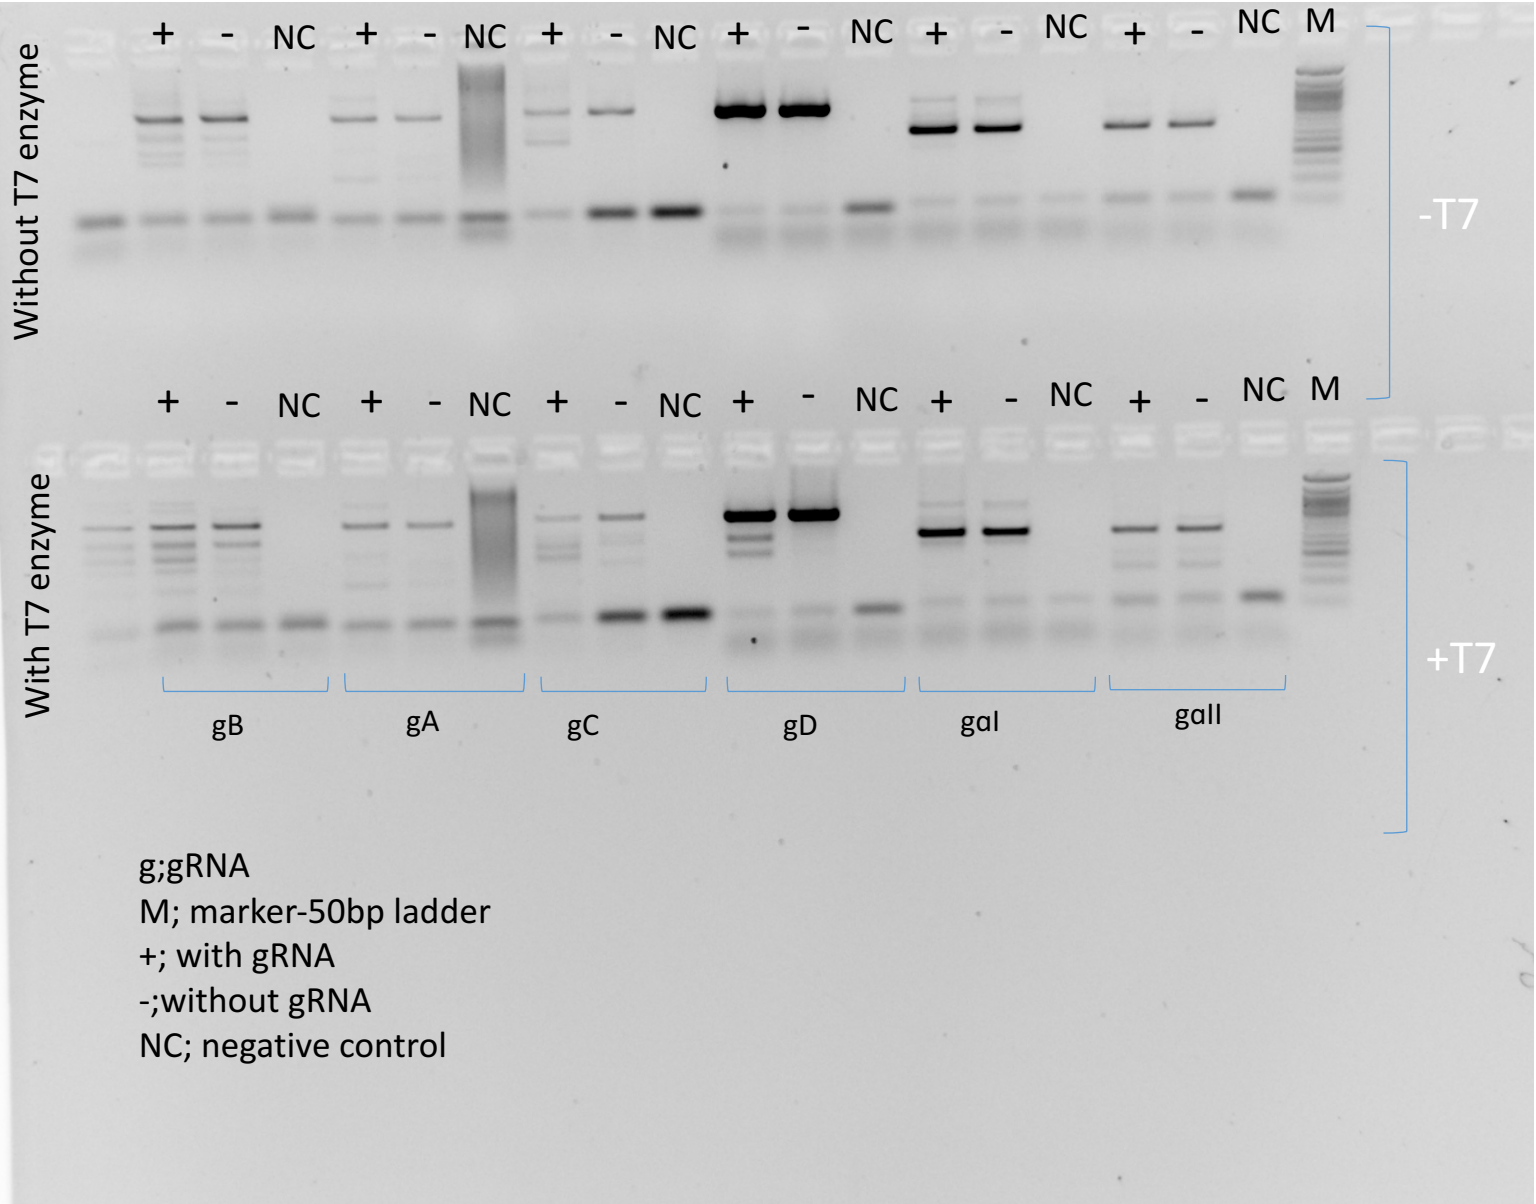

9.11.2015

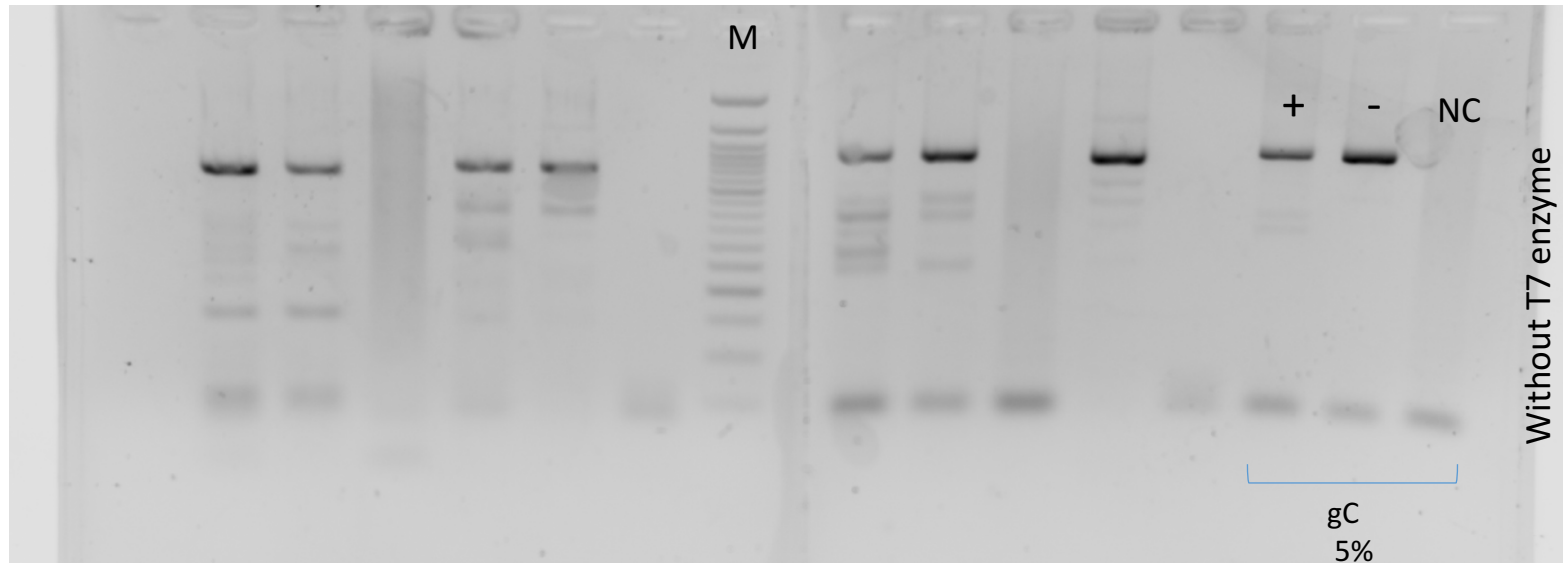

g;gRNA  
M; marker-50bp ladder  
+; with gRNA  
-;without gRNA  
NC; negative control

g;gRNA  
M; marker-50bp ladder  
+; with gRNA  
-;without gRNA  
NC; negative control

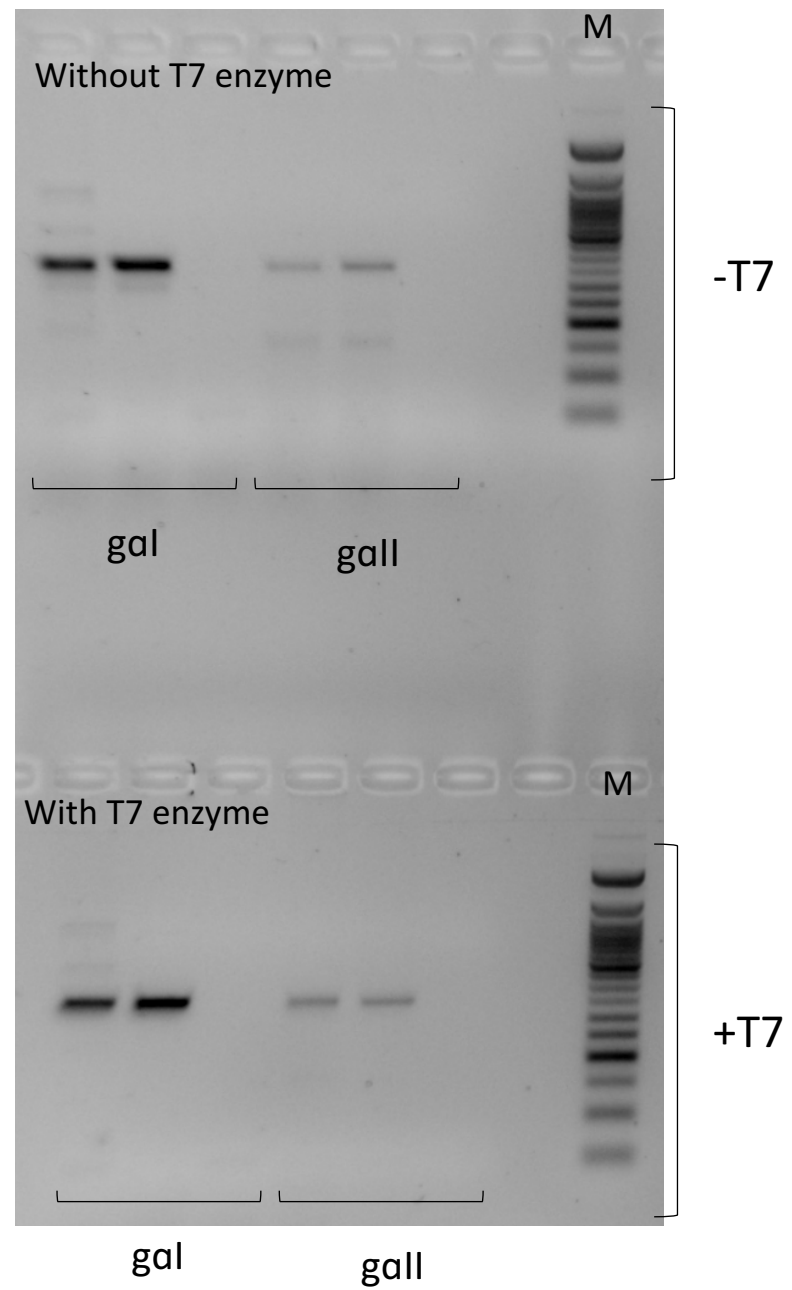

Supplement: mmc1.pdf [file mmc1.pdf]
